# Supplementary material for: Continued Organic Fertigation after Basal Manure Application Does Not Impact Soil Fungal Communities, Tomato Yield or Soil Fertility
Source: MDPI journal article supplement (doi:10.3390/microorganisms11071715), 2023-06-30
Supplement: s1 [file s1]

**Table S1.** Electrical conductivity (EC) of irrigation water (“water”) and nutrient solution supplied through fertigation (“fertigation”) in the experimental plots. M1: sample taken on 25 February 2021; M2: sample taken on 3 March 2021.

|       | Water     | Fertigation | <i>p</i> -value <sup>x</sup> |
|-------|-----------|-------------|------------------------------|
| EC M1 | 0.85±0.02 | 3.28±0.06   | 0                            |
| EC M2 | 0.79±0.00 | 3.32±0.08   | 0                            |

Bold *p*-values denote statistical differences through the Student's *t*-test. <sup>x</sup> Statistical analysis performed with the square root transformation.

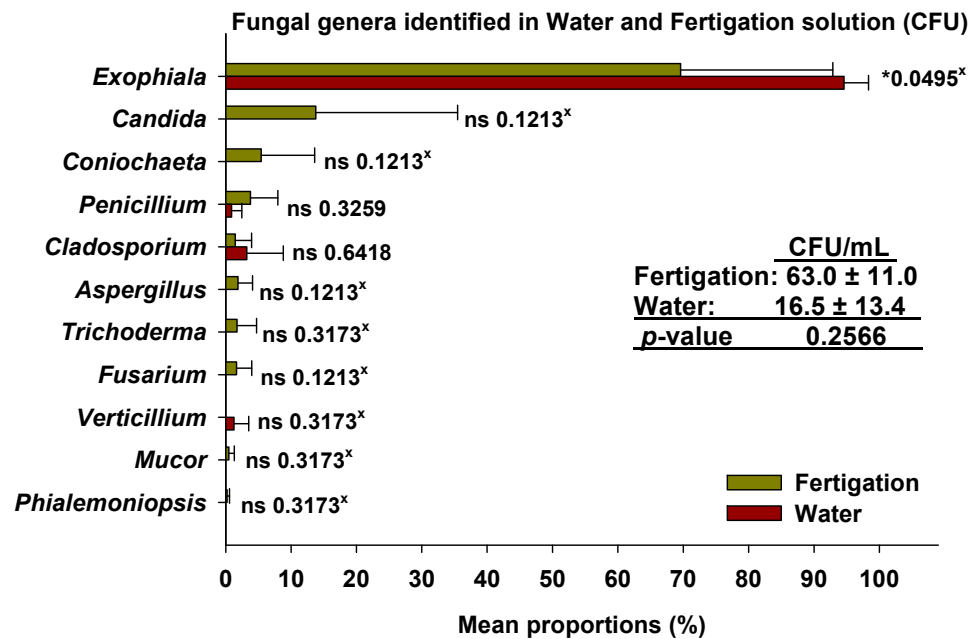

**Figure S1.** Culturable fungal genera identified in the water and the fertigation solution applied in the experimental plots. Samples taken on 25/02/21. Values (mean ± standard deviation; *n* = 3). ‘\*’ indicates significance at *p* ≤ 0.05 (t-Student or Kruskal–Wallis test), respectively. ‘ns’ indicates non significance. ‘x’ *p*-value through the Kruskal–Wallis non-parametric test.
